# Supplementary material for: Multimodal two-photon imaging using a second harmonic generation-specific dye
Source: PubMed Central journal article supplement (PMC4865818; doi:10.1038/ncomms11557), 2016-05-09
Supplement: ncomms11557-s2.pdf [file ncomms11557-s2.pdf]

Transferred manuscripts:

**Editorial Note:** this manuscript has been previously reviewed at another journal that is not operating a transparent peer review scheme. This document only contains reviewer comments and rebuttal letters for versions considered at Nature Communications.
